# Supplementary material
Source: PubMed Central journal article supplement (PMC6868311)
Supplement: NIHMS1055060-supplement-SI.pdf [file NIHMS1055060-supplement-SI.pdf]

## Supporting Information

A water-soluble nanoconjugate for enhanced cellular  
delivery  
of receptor-targeted MR contrast agents

*Laura K. Moore,<sup>1†</sup> Michael A. Caldwell,<sup>2†</sup> Taryn R. Townsend,<sup>2</sup> Keith  
W. MacRenaris,<sup>2</sup> Georgette Moyle-Heyrman,<sup>4</sup> Nikhil Rammohan,<sup>2</sup> Erika  
K. Schonher,<sup>2</sup> Joanna E. Burdette,<sup>4</sup> Dean Ho,<sup>5‡</sup> Thomas J. Meade<sup>1,2‡</sup>*

1 Department of Biomedical Engineering, Feinberg School of  
Medicine, Northwestern University, Chicago, IL 60611

2 Departments of Chemistry, Molecular Biosciences, Neurobiology,  
and Radiology, Northwestern University, Evanston, IL, 60208

4 Department of Medicinal Chemistry and Pharmacognosy,  
University of Illinois at Chicago, Chicago, IL, 60607

5 The N.1 Institute for Health (N.1) National University of  
Singapore, Singapore 117556  
Department of Biomedical Engineering: NUS Engineering  
National University of Singapore, Singapore, 117583

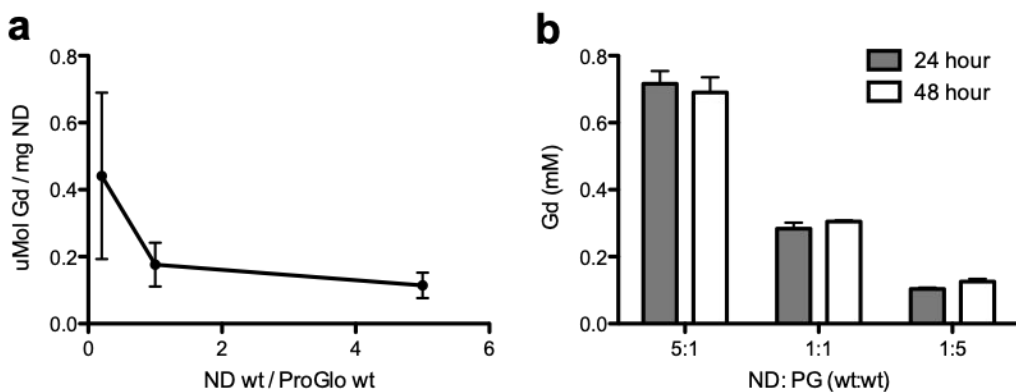

**S1.** A 24 hr coincubation at a 5:1 weight to weight ratio of ND to ProGlo produced the highest total loading (**b**) and loading per mg ND (**a**) of ProGlo into ND-ProGlo. The concentration of ProGlo utilized for loading was approximately 1.8 mM and the incubation concentration of ND was reduced from 8.3 mg/mL to 0.3 mg/mL across the series.

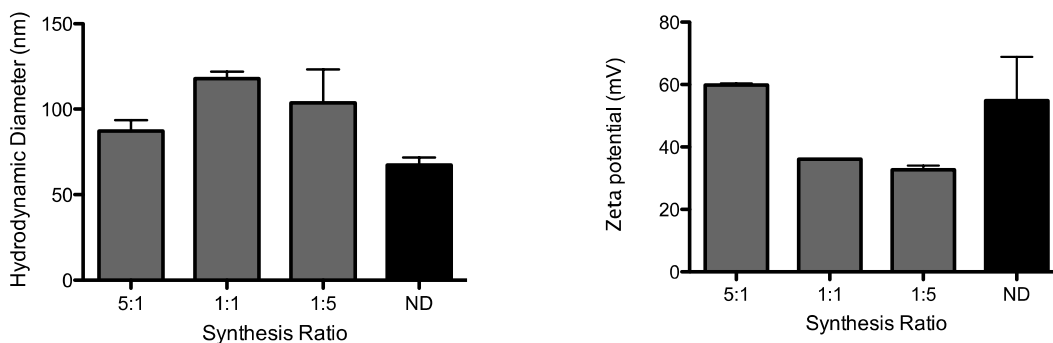

**S2. a.** The hydrodynamic diameter of ND-ProGlo aggregates synthesized by varying the wt:wt ratio of ND to ProGlo (n=3). **b.** Zeta-potential of ND-ProGlo synthesized at varying ratios (n=3). Hydrodynamic diameters and zeta-potentials were measured for native NDs and ND-ProGlo modified with varying ratios of ND to ProGlo. Addition of ProGlo produced an increase in aggregate size that varied little with increasing ProGlo loading. Zeta potentials showed a decrease with increasing stoichiometric ratios (and loading) of ProGlo.

| Agent             | $r_1^a$        | $r_2^a$        | $r_2/r_1$ | LogP             |
|-------------------|----------------|----------------|-----------|------------------|
| <b>ProGlo</b>     | $5.4 \pm 0.7$  | $6.1 \pm 0.8$  | 1.15      | $1.40 \pm 0.08$  |
| <b>ND- ProGlo</b> | $22.7 \pm 1.5$ | $37.9 \pm 2.3$ | 1.67      | $-2.40 \pm 0.26$ |

<sup>a</sup> $r_1$  and  $r_2$  measured in  $\text{mM}^{-1}\text{s}^{-1}$  at 1.41 T, 37 °C

**S3. Supplementary Table 1.** Relaxivities of ProGlo and ND-ProGlo were measured at 1.41 T in a Bruker bench-top relaxometer in 1% DMSO in water and pure water, respectively. ND-ProGlo showed a significant increase in relaxivity over molecular ProGlo, as expected from the increase in  $\tau_r$  associated with immobilization on a particle. The logP values for of ProGlo and ND-ProGlo reflect the change from hydrophobic to hydrophilic character upon loading of ProGlo into ND clusters.

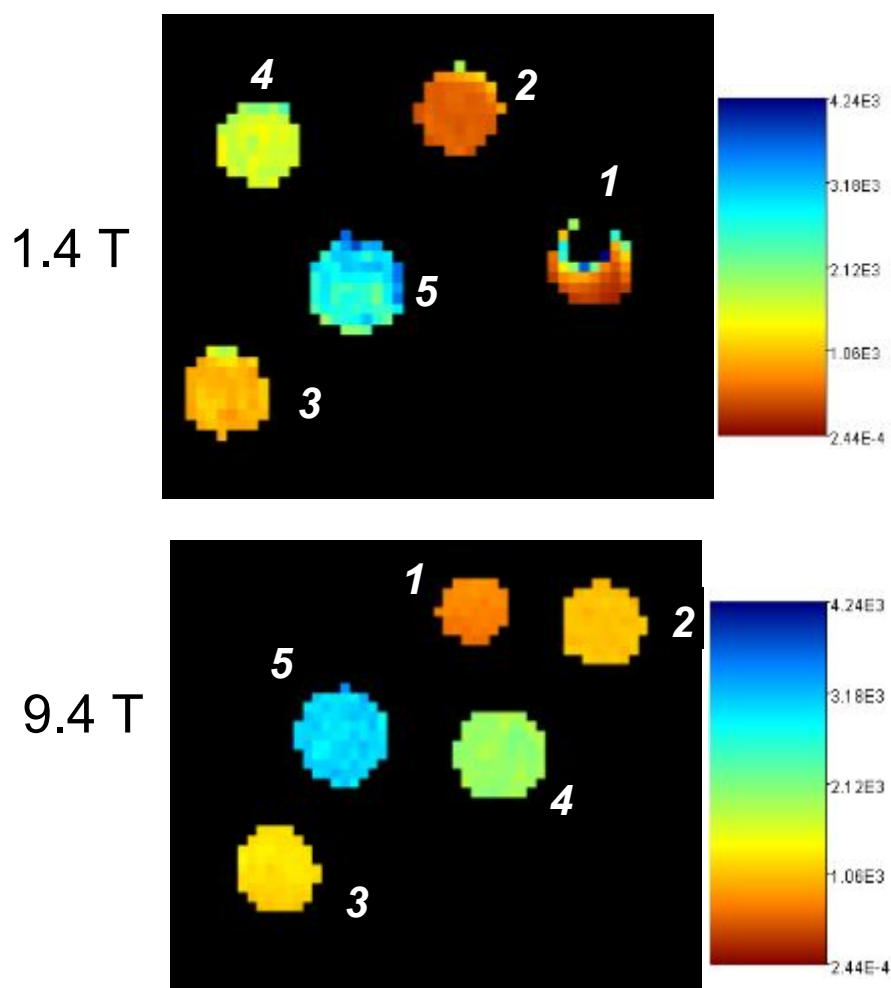

**S4.** MR phantom images of ND-ProGlo solutions: 1.4 T (top) and 9.4 T (bottom). The tubes containing the samples are: **(1)** ProGlo-ND [Gd(III) = 0.14 mM, 5 mg ND], **(2)** ProGlo-ND [Gd(III) = 0.07 mM, 2.5 mg ND] **(3)** ProGlo [Gd(III) = 0.10 mM, in 1% DMSO], **(4)** ND-COOH (5 mg ND), and **(5)** water. The images are consistent with the observed relaxivities, where ProGlo-ND solutions show significantly faster  $T_1$  times than ProGlo in phantom images. NDs alone have only a small effect on observed  $T_1$ s.
